# Supplementary material
Source: Springer Nature journal article supplement (https://www.springermedizin.de/resource/supplementary/12913_2013_2959_MOESM1_ESM.pdf/9533250)
Supplement: MOESM1 [file 9533250]

| Carer Cohort                                                                                                                                                                                                                                              |                                                                                                     | Patient Cohort                                                                                                       |
|-----------------------------------------------------------------------------------------------------------------------------------------------------------------------------------------------------------------------------------------------------------|-----------------------------------------------------------------------------------------------------|----------------------------------------------------------------------------------------------------------------------|
| <b>Intervention</b>                                                                                                                                                                                                                                       | <b>Attention Control</b>                                                                            | <i>Patients identified, invited to participate (as part of carer/patient dyad)</i><br><br><b>Baseline Assessment</b> |
| <i>Carers identified, invited to participate (as part of carer/patient dyad)</i>                                                                                                                                                                          |                                                                                                     |                                                                                                                      |
| <b>Randomised to Cancer Helpline</b>                                                                                                                                                                                                                      | <b>Randomised to minimal telephone service</b>                                                      |                                                                                                                      |
| <b>Outcalls (*3) by Helpline nurse</b><br>1. screens for distress using DT and refers carer back to GP for follow up supportive care services (DT $\geq$ 4)<br>2. raises 6 topics for discussion;<br>3. referral to supportive care services as required. | <b>Outcalls (*3) by Research Staff: standard spiel</b><br>Reminder about accessing Cancer Helpline. |                                                                                                                      |
| <b>Follow up assessment 1 month post intervention</b>                                                                                                                                                                                                     |                                                                                                     | <b>Follow-up assessment 1 month post intervention</b>                                                                |
| <b>Follow up assessment 6 months post intervention</b>                                                                                                                                                                                                    |                                                                                                     |                                                                                                                      |
